# Supplementary material
Source: PubMed Central journal article supplement (PMC5114850)
Supplement: NIHMS825380-supplement-Supplement.pdf [file NIHMS825380-supplement-Supplement.pdf]

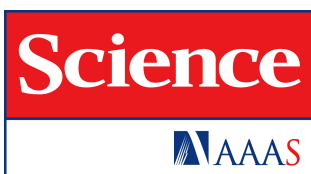

## Supplementary Materials for

### **Structure of the STRA6 receptor for retinol uptake**

Yunting Chen<sup>†</sup>, Oliver B. Clarke<sup>†</sup>, Jonathan Kim, Sean Stowe, Youn-Kyung Kim, Zahra Assur, Michael Cavalier, Raquel Godoy-Ruiz, Desiree C. von Alpen, Chiara Manzini, William S. Blaner, Joachim Frank, Loredana Quadro, David J. Weber, Lawrence Shapiro, Wayne A. Hendrickson and Filippo Mancia

correspondence to: [fm123@cumc.columbia.edu](mailto:fm123@cumc.columbia.edu)

#### **This PDF file includes:**

Figs. S1 to S14  
Tables S1 to S3  
Captions for Movies S1 to S3

#### **Other Supplementary Materials for this manuscript includes the following:**

Movies S1 to S3

**Table S1: Data collection and validation statistics for STRA6-CaM cryo-EM structure.**

| <b>Dataset</b>                      | <b><i>Danio rerio</i> STRA6-CaM</b> |
|-------------------------------------|-------------------------------------|
| Pixel size (Å)                      | 1.255                               |
| Number of grids                     | 2                                   |
| Number of micrographs (total)       | 2613                                |
| Number of micrographs (final)       | 1657                                |
| Number of picked particles          | 317416                              |
| Final number of particles           | 56615                               |
| Box size (pixels)                   | 200                                 |
| Symmetry                            | C2                                  |
| Resolution, overall                 | 3.9                                 |
| Est. accuracy rotations (degrees)   | 2.49                                |
| Est. accuracy translations (pixels) | 0.72                                |
| Applied B-factor (sharpening)       | -113.68                             |
| Molprobit clashscore                | 5.23                                |
| Ramachandran favored (%)            | 94.03                               |
| Ramachandran allowed (%)            | 5.28                                |
| Ramachandran outliers (%)           | 0.69                                |
| Rotamer outliers (%)                | 0.16                                |

**Table S2: Data collection and refinement statistics for CaM-CaMBP2 complex crystal structure.** Values in the highest resolution shell (1.801-1.739) are given in parentheses.

|                                |                                 |
|--------------------------------|---------------------------------|
| Wavelength                     | 0.97919                         |
| Resolution range               | 25.37 - 1.739 (1.801 - 1.739)   |
| Space group                    | C 1 2 1                         |
| Unit cell                      | 156.5, 37.2, 35.7; 90, 94.4, 90 |
| Total reflections              | 67579 (3076)                    |
| Unique reflections             | 21134 (2084)                    |
| Multiplicity                   | 3.2 (2.6)                       |
| Completeness (%)               | 98.8 (97.8)                     |
| Mean I/sigma(I)                | 6.7 (1.2)                       |
| Wilson B-factor                | 18.29                           |
| R-merge                        | 0.095 (0.658)                   |
| R-meas                         | 0.131 (0.882)                   |
| CC1/2                          | 0.986 (0.609)                   |
| Reflections used in refinement | 21098 (2083)                    |
| Reflections used for R-free    | 1026 (115)                      |
| R-work                         | 0.2279 (0.3448)                 |
| R-free                         | 0.2672 (0.4032)                 |
| Number of non-hydrogen atoms:  | 1504                            |
| macromolecules                 | 1364                            |
| ligands                        | 10                              |
| Protein residues               | 172                             |
| RMS(bonds)                     | 0.007                           |
| RMS(angles)                    | 0.88                            |
| Ramachandran favored (%)       | 100                             |
| Ramachandran allowed (%)       | 0                               |
| Ramachandran outliers (%)      | 0                               |
| Rotamer outliers (%)           | 0                               |
| Molprobrity clashscore         | 2.97                            |
| Average B-factor:              | 32.35                           |
| macromolecules                 | 32.06                           |
| ligands                        | 30.25                           |
| solvent                        | 35.52                           |
| Number of TLS groups           | 5                               |

**Table S3: STRA6 MWS missense mutations**

| <b>Mutation</b> | <b>zSTRA equivalent position</b> | <b>Structural element</b> | <b>Reference</b>                                   |
|-----------------|----------------------------------|---------------------------|----------------------------------------------------|
| P90L            | P77                              | TM1TM2L                   | Pasutto, F. <i>et al.</i> , Am. J. Human Gen. 2007 |
| P293L           | P272                             | JM1TM6L                   | Pasutto, F. <i>et al.</i> , Am. J. Human Gen. 2007 |
| T321P           | T300                             | TM6                       | Pasutto, F. <i>et al.</i> , Am. J. Human Gen. 2007 |
| T644M           | T613                             | CaMBP2                    | Pasutto, F. <i>et al.</i> , Am. J. Human Gen. 2007 |
| R655C           | R626                             | $\alpha$ CT               | Pasutto, F. <i>et al.</i> , Am. J. Human Gen. 2007 |
| G217E           | A194                             | TM5                       | White, T. <i>et al.</i> , Mol. Vis. 2008           |
| Q438R           | Q417                             | TM8                       | Chassaing, N. <i>et al.</i> , Human Mut. 2009      |
| R638P           | R609                             | CaMBP2                    | Chassaing, N. <i>et al.</i> , Human Mut. 2009      |
| D560H/R655H     | D539/R626                        | JML/ $\alpha$ CT          | Segel, R. <i>et al.</i> , Am. J. Med. Gen. 2009    |
| G304K           | F283                             | TM6                       | Casey, J. <i>et al.</i> , Human Mut. 2011          |
| R408Q           | R387                             | TM7TM8L                   | Slavotinek, A.M. <i>et al.</i> , Clin. Genet. 2015 |
| G339S           | G318                             | TM6TM7L (lid helix)       | Kawaguchi, R., <i>et al.</i> , J. Biol. Chem. 2008 |



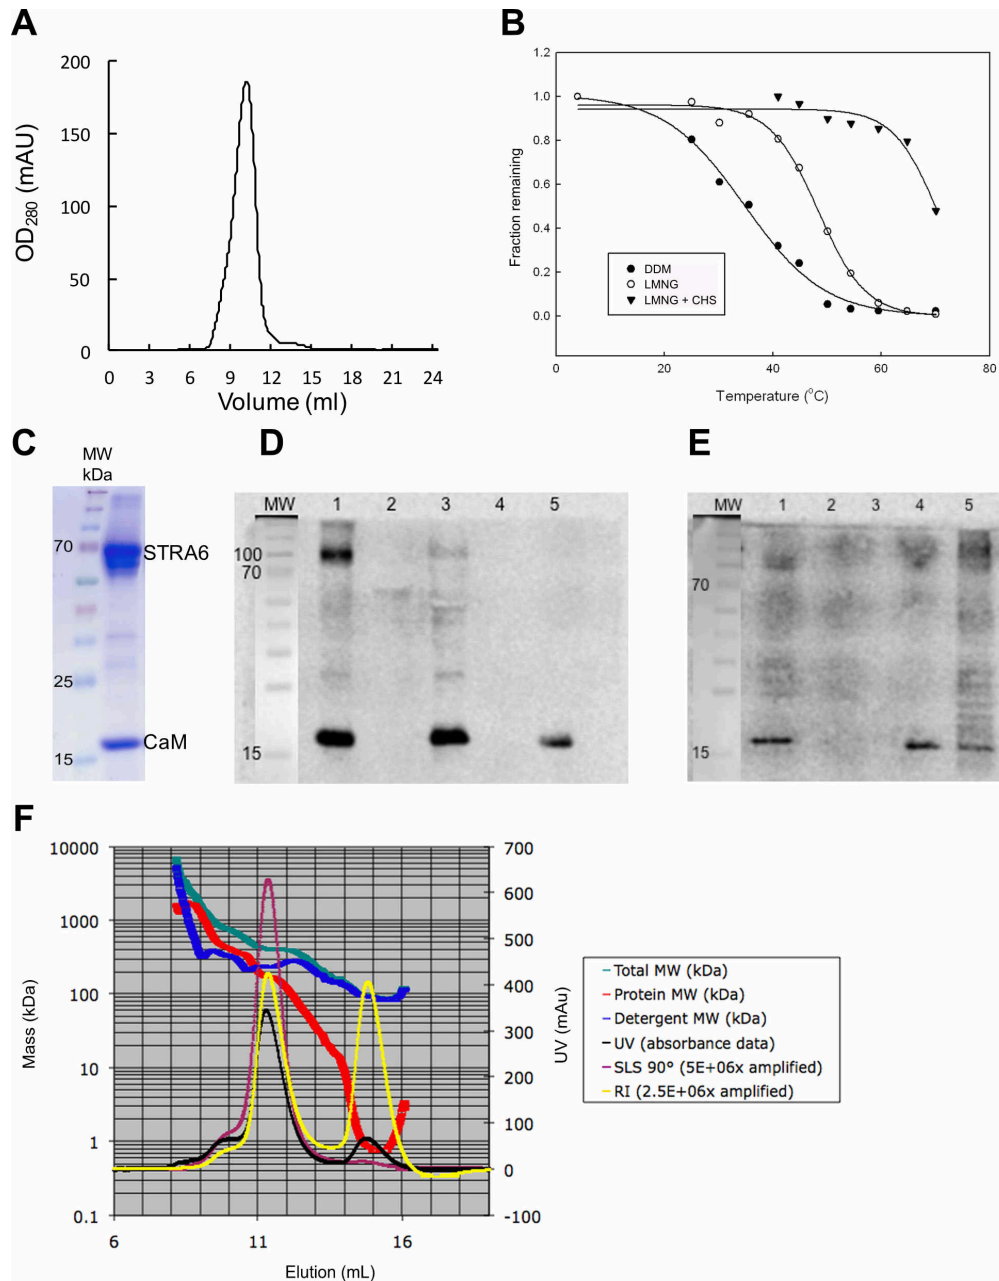

**Fig. S1. Purification and biochemical characterization of zebrafish STRA6.** (A) Elution profile from size exclusion chromatography of STRA6 purified in buffer containing LMNG and CHS. (B) Denaturation curves of STRA6 purified in  $\beta$ DDM (black circles), LMNG (MNG, white circles) and LMNG/CHS (MNG+CHS, black triangles). The fraction of folded protein remaining is plotted against a control sample maintained at 4 °C. (C) Purified STRA6 analyzed on SDS-PAGE denaturing gel, stained by Coomassie blue. (D) Immunoblot of STRA6-CaM complex purified from transiently transfected HEK cells. Probed with anti-CaM antibody. Lanes as follows: (1): zebrafish STRA6-CaM purified from insect cells and reconstituted in amphipol; (2): Pulldown from HEK cells transfected with control plasmid pFM1.2; (3): Pulldown from HEK cells transfected with expression plasmid for zebrafish STRA6; (4): Empty; (5):

Purified recombinant human CaM (5ng). **(E)** Immunoblot of STRA6-CaM complex immunoprecipitated using an anti-STRA6 antibody from native zebrafish tissue. Probed with anti-CaM antibody. Lanes as follows: (1): zebrafish STRA6 immunoprecipitated using antibodies against the recombinant protein purified from insect cells; (2): Immunoprecipitation using control antibody; (3): Empty; (4) Purified recombinant human CaM; (5): Supernatant from immunoprecipitation (5 $\mu$ g total protein). **(F)** Oligomerization state of STRA6 in a solution containing  $\beta$ DDM, determined by multi angle light scattering coupled to refractive index and UV measurements. The estimated molecular weight of the protein component is ~200 kDa (left peak), consistent with STRA6 being a dimer in solution associated with two molecules of CaM. The peak to the right corresponds to excess  $\beta$ DDM in micelles of ~100 kDa.

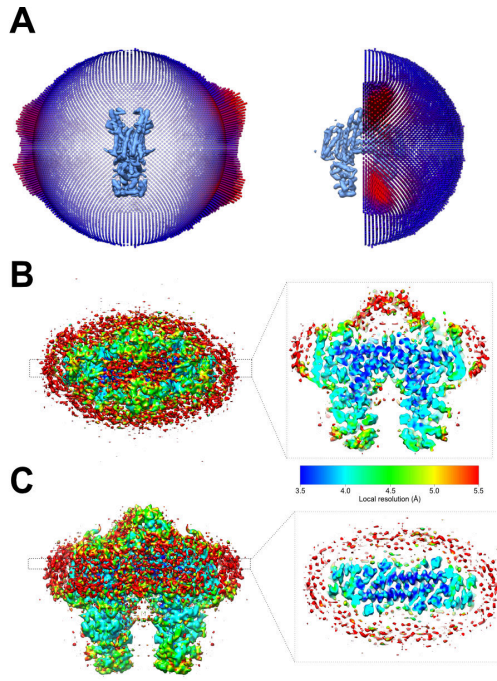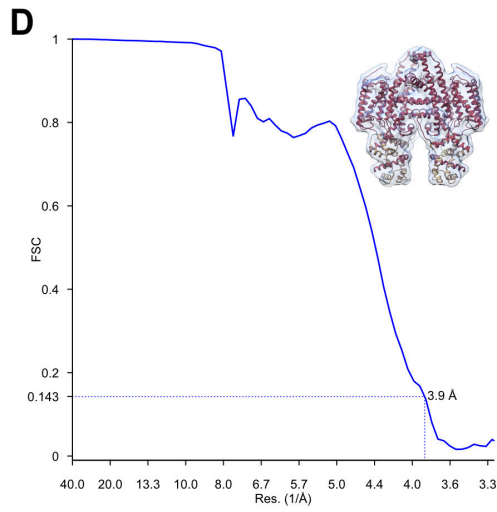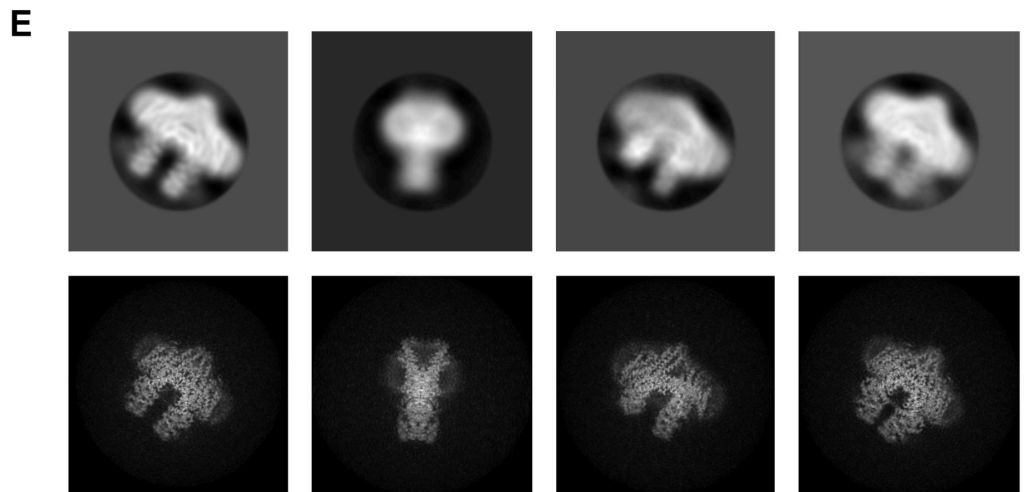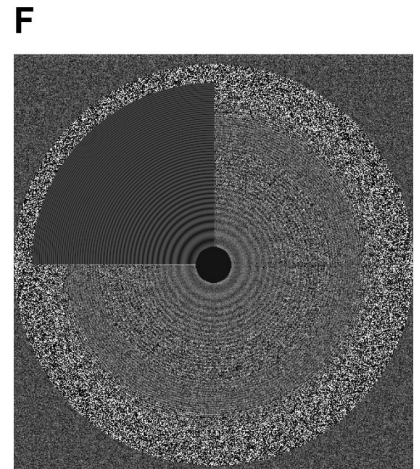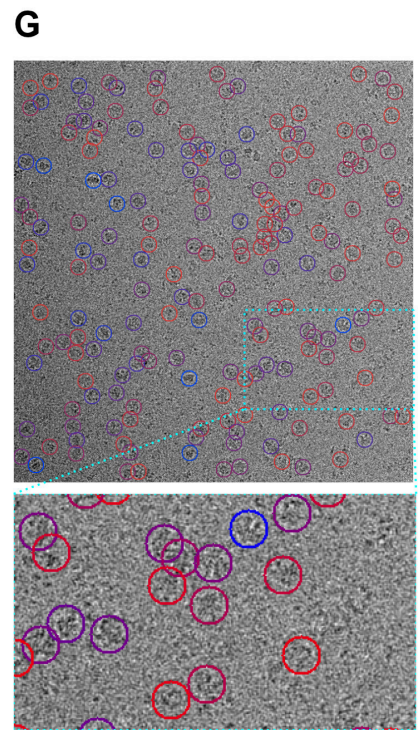

**Fig. S2. Cryo-EM analysis of *Danio rerio* STRA6.** (A) Orientation distribution of particles in the final C2-symmetric reconstruction. The reconstruction is positioned in the center of a sphere as reference, and a histogram displaying the frequency of each unique orientation is represented on the surface of the sphere, with the length of each cylindrical bar proportional to the population size of particles in the final reconstruction with that angular orientation. (B) Final reconstruction colored by local resolution, calculated using ResMap (68), viewed from the extracellular region. A central vertical slab through the TM region is represented at right. (C) As B, viewed parallel to the membrane, with a slab taken through the TM region displayed in the inset. (D) Fourier Shell Correlation plot of the final refined reconstruction. The resolution at which the curve drops below 0.143 is indicated, and a thumbnail of the mask used for FSC calculation is inset, overlaid on the atomic model. (E) Four representative 2D class averages (upper panels) with maximum intensity projections of the final reconstruction in matching orientations (lower panels) (F) Power spectrum of a representative stack, calculated as an average of the power spectra of the frames in the stack with a window size of 3 frames. The contrast transfer function, fit using CTFFIND4 to a resolution of 3.0 Å, is displayed in the upper left quadrant. (G) Representative micrograph with particles picked using *reliion\_autopick* (prior to 2D and 3D classification) circled and colored by the autopick figure of merit. A magnified view of an indicated section of the micrograph is represented below the main panel.

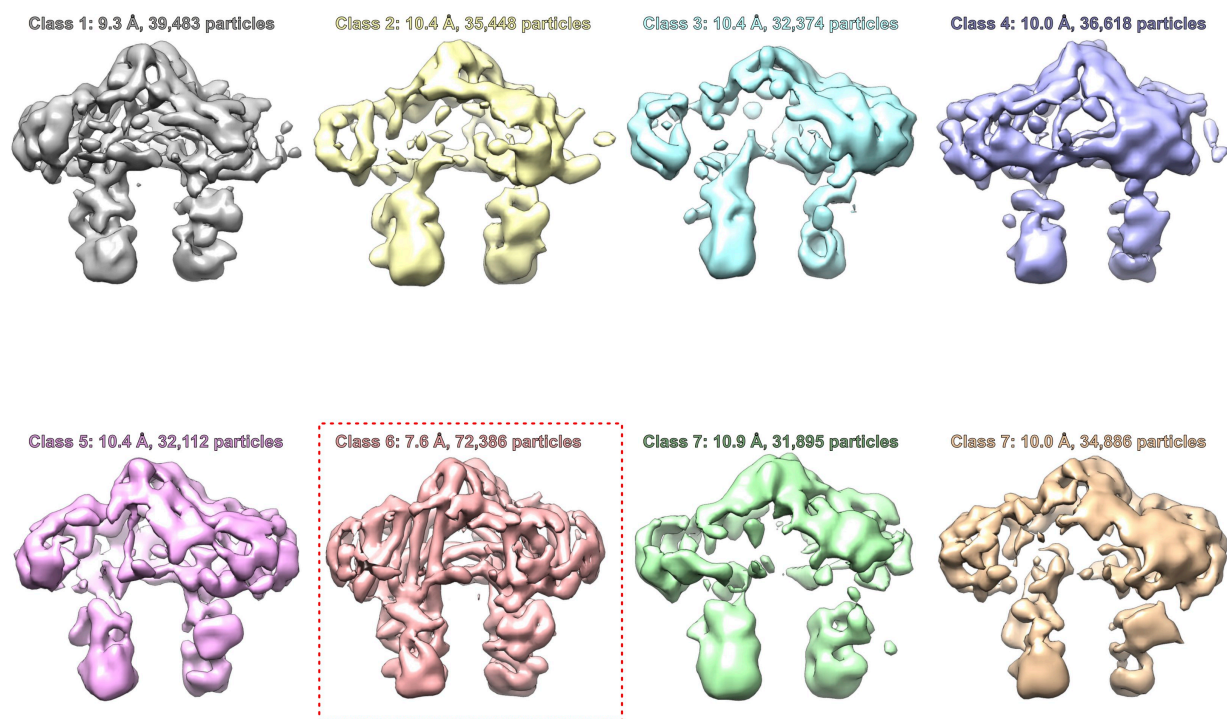

**Fig. S3. Analysis of heterogeneity by 3D classification.** The eight classes obtained from 3D classification with Relion 1.3 are viewed parallel to the membrane with the resolution where the SSNR of the class drops below 2.0, as well as the number of particles in each class, labeled above each panel. Class 6, which was chosen for high-resolution refinement, is enclosed within a dashed red box.



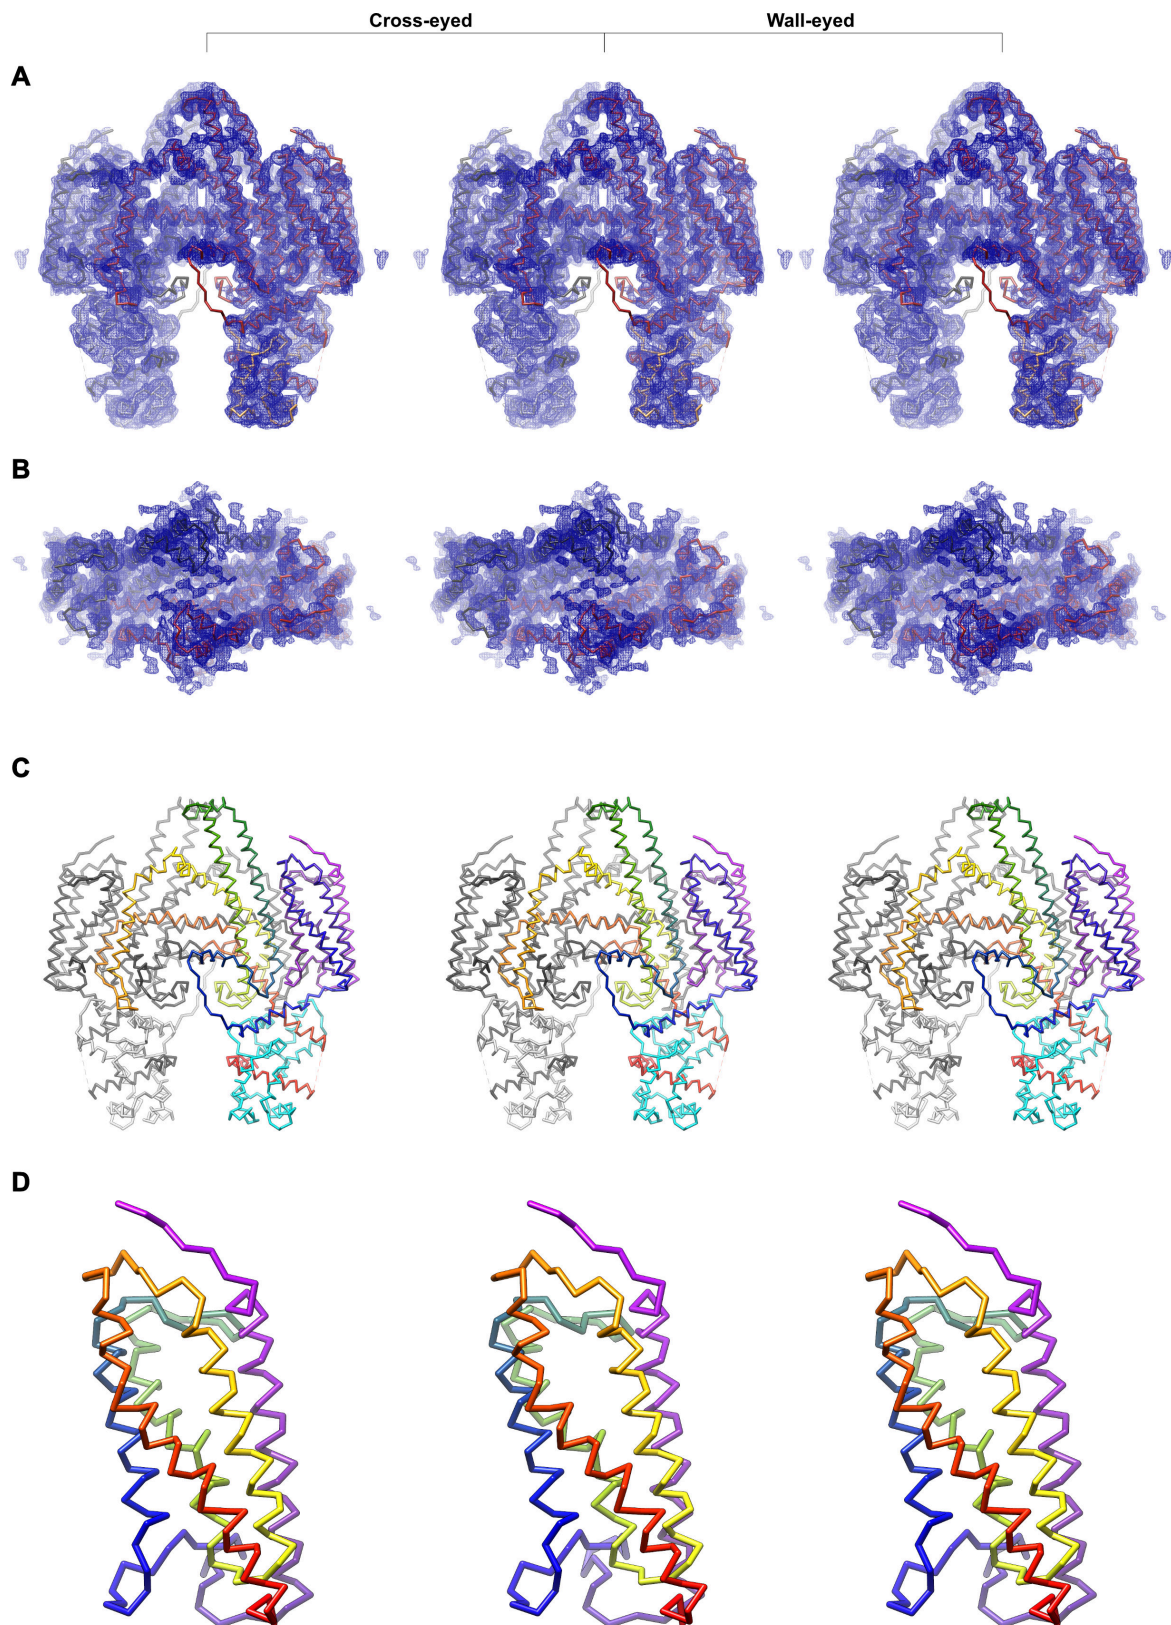

**Fig. S4. STRA6 fold and global quality of the cryo-EM density map.** All panels are represented in stereo, as indicated. All density maps are contoured at 6

X R.M.S. **(A & B)** Two views of the density maps are shown, together with the  $C\alpha$  trace of the entire structure, in which one STRA6 protomer is displayed in dark red, and one CaM in yellow. **(C)** STRA6-CaM is depicted in licorice representation. One protomer of STRA6 is represented in spectral coloring, from violet N-terminus to red C-terminus. One protomer of CaM is colored cyan. **(D)** The TM1-TM5 bundle (residues 31-209) is depicted in licorice representation, in spectral coloring from violet (31) to red (209). The viewpoint is parallel to the membrane and to the IM helix axis. The N-terminal segment of STRA6, preceding TM1 is adjacent to the TM4-5 loop. The relative position of these two segments is consistent with the presence of a predicted disulfide bond between C31 and C171 (15). A distinctive feature of the NTD is that TM3 has a two-proline kink in the middle of the membrane, separating it into two segments (TM3a and TM3b) with an interhelical angle of  $17^\circ$

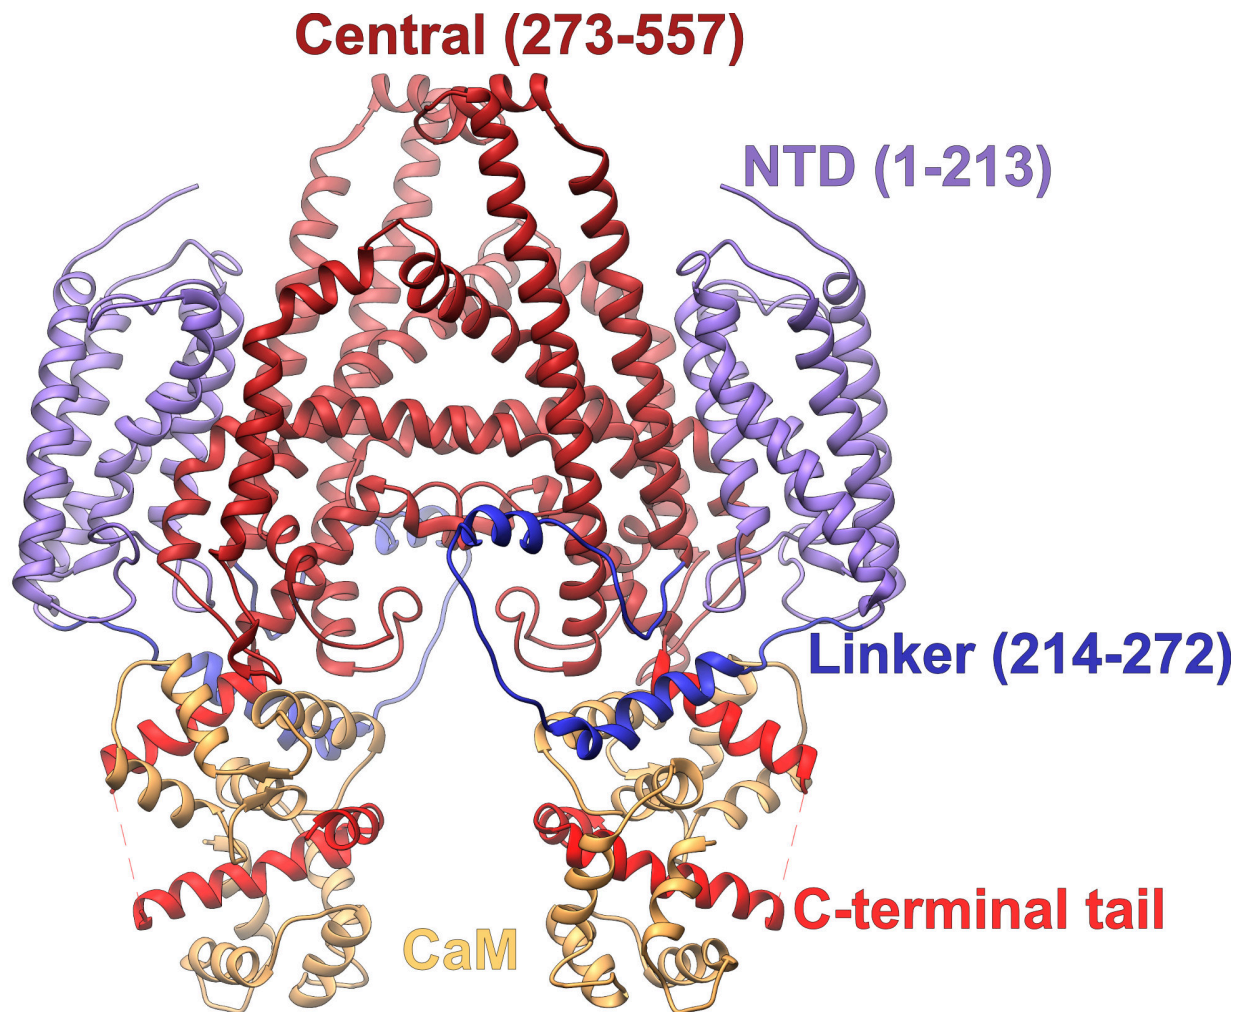

**Fig. S5 Domain representation of the STRA6-CaM complex.** Ribbon representation of the STRA6-CaM complex colored by domain, and labeled. Residue ranges are provided in parenthesis.



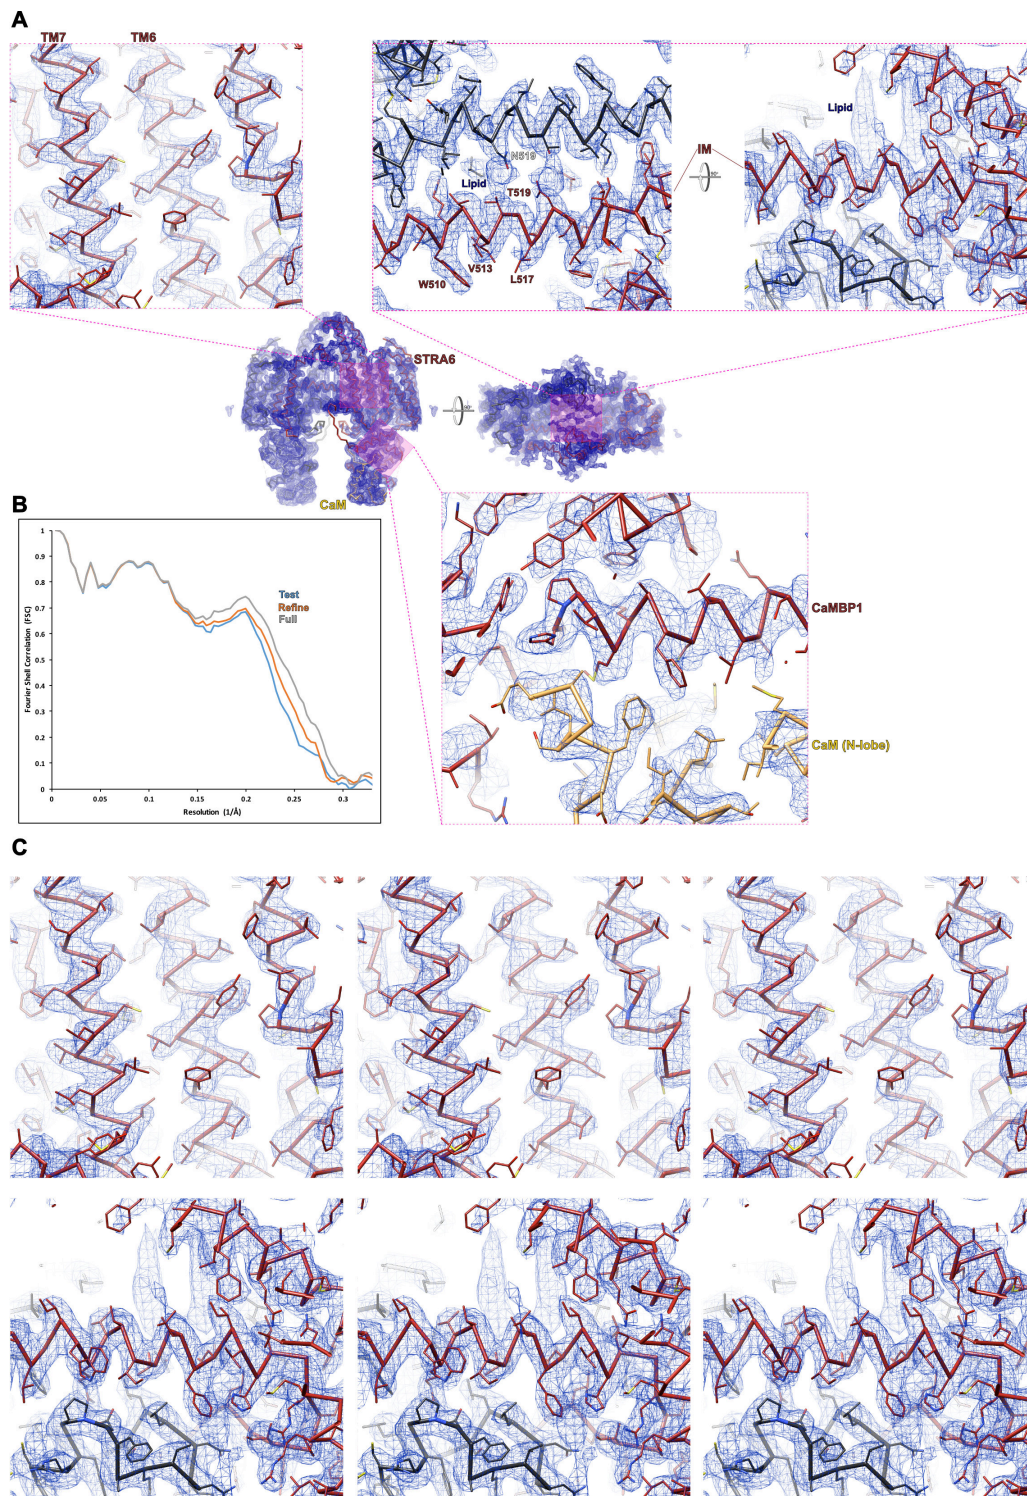

**Fig. S6. Quality of the cryo-EM density map.** (A) Two views of the STRA6-CaM complex are represented in the center and three insets are arranged around it, showing density quality in specific regions of the structure, with the structure represented as a  $C\alpha$  trace with side chains in stick representation. (B) Model-map FSC curves calculated for the full map used for initial model building (gray); the test half-map withheld from the cross-validation refinement run (orange) and the

half-map used in the cross-validation refinement (blue). For details of model-map FSC calculations see Materials & Methods. Stereo views of two of the insets from (A) are shown in panel (C). Density maps are contoured at 6 X R.M.S.



D. rerio (A4IG66) /1-670  
H. sapiens (Q9XK79) /1-667  
L. oculatus (W5NCL1) /1-664  
O. niloticus (I3KE07) /1-658  
X. maculatus (M4AN84) /1-665  
P. formosa (A0A087XK69) /1-665  
A. mexicanus (W5LF12) /1-668  
G. gallus (F1NSC4) /1-671  
F. albicollis (U3KCM6) /1-645  
M. domestica (F6X9H5) /1-684  
R. norvegicus (Q4QR83) /1-670  
M. musculus (070491) /1-670  
H. glaber (G5BRG2) /1-662  
C. porcellus (H0VUR2) /1-671  
C. familiaris (J9NW10) /1-655  
L. africana (G37653) /1-669  
O. garnettii (H0X180) /1-707  
P. anubis (A0A096MM01) /1-704  
C. sabaueus (A0A09RNU1) /1-659  
M. mulatta (F7GR11) /1-667  
M. fascicularis (G7P935) /1-667  
G. Gorilla (G3R6K2) /1-707  
P. abelli (Q5R7B4) /1-667  
B. taurus (F1N406) /1-668  
P. alecto (L5JW03) /1-658  
E. caballus (F626X7) /1-667

-----MSAETVN-NYDYSWYENALPTKAPV-----EVIPPCDPTADEGL 39  
-----MSSQPA--GNQTSFGATE-DYSYSGWYDEPOGGEEL-OPE-----EVIPPCDPTADEGL 51  
-----KAMASIDVPKDDSYEYVQLEPTTSP-----DPTLQCDPTADDDRL 43  
-----MDYDPE--LDPLPSKIEP-----EVIPPCDPTADDDRL 31  
-----MKDALV-DYEYD--LDPLPSKIEP-----ETIPPCDPTADDDRL 37  
-----MKDALV-DYEYD--LDPLPSKIEP-----ETIPPCDPTADDDRL 40  
-----MSAETGKDYDYSWYENALPTKPI-----EVIPPCDPTADDDGL 37  
-----MAANNSGAHGSLLDSDYIYETAEPAP--QDDMFPSTIPEDDPTVSPRL 57  
-----DNYLYESTESTP--QDDLYESTESTP--QDDLYESTESTP--QDDLYESTESTP 32  
-----MDEILSLPFSASLCEVPEKMSLSLAA--ANQSS--GSE--DYSYSGWYDEPOGGEEL-OPE-----EVIPPCDPTADEGL 72  
-----MESQASENGSTQSSGVD--DYS--SWYIEEPLGAEV-OPE-----GVNPLCOPTVAPPAL 51  
-----MESQASENGSTQSSGVD--DYS--SWYIEEPLGAEV-OPE-----GVNPLCOPTVAPPAL 51  
-----MSLSQAA--GNQTSFGAD--DYS--SWYDEPOGKEL-OPE-----GEVPSOPSPVAPPAL 50  
-----MSLSQAA--ENQTSRAAD--DYS--SWYDEPLEDKEL-OPE-----GEVPSOPSPVAPPAL 50  
-----MSSQAA--GNQTSAGAD--DYS--DNYLDEPODQEL--PAE--GAVPSCHPVLSPGL 49  
-----MSSQAA--GNQTS--GATE--DYSYSGWYDEPPGEEP--KPE--RNVLSOTSPVAPPAL 57  
-----IGDQGTGGTTRGSPQPAPWDLSPRSFRLKARVGGELKMSQAA--GNQTS--STG--DYS--DNYLDEPOGGEEL--OPD--GTVPSCHPSPVAPPAL 52  
-----MCMCECAPIRRAHPLELTPGHEVDLGLCLFMDSQDQAQEEGKRRMSQPA--GNQTSFGATE--DYSYSGWYDEPOGGEEL-OPE-----GEVPSCHPSPVAPPAL 56  
-----MSSQPA--GNQTSFGATE--DYSYSGWYDEPOGGEEL-OPE-----GEVPSCHPSPVAPPAL 51  
-----MSSQPA--GNQTSFGATE--DYSYSGWYDEPOGGEEL-OPE-----GEVPSCHPSPVAPPAL 51  
-----MSSQPA--GNQTSFGATE--DYSYSGWYDEPOGGEEL-OPE-----GEVPSCHPSPVAPPAL 51  
-----MSSQPA--GNQTSFGATE--DYSYSGWYDEPOGGEEL-OPE-----GEVPSCHPSPVAPPAL 51  
-----MGGKGGGDTTRGVLFPFPCQAQLSPRRAPRELKGGKRRMSQPA--GNQTSFGATE--DYSYSGWYDEPOGGEEL-OPE-----GEVPSCHPSPVAPPAL 50  
-----MSSQPA--GNQTSFGATE--DYSYSGWYDEPOGGEEL-OPE-----GEVPSCHPSPVAPPAL 51  
-----MSTQAA--GNQTSFGATE--DYSYSGWYDEPOGGEEL-OPE-----GLVPSOPSPVAPPAL 52  
-----MSEAA--RMTQSSGTD--DYSYSGWYDEPOGGEEL-OPE-----GAVPSCHPSPVAPPAL 50  
-----MSSQAT--GNQTSQAD--DYSYSGWYDEPPGQEL-OPE-----GVVPPCHPSPVAPPAL 51

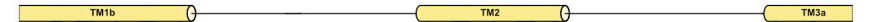

D. rerio (A4IG66) /1-670  
H. sapiens (Q9XK79) /1-667  
L. oculatus (W5NCL1) /1-664  
O. niloticus (I3KE07) /1-658  
X. maculatus (M4AN84) /1-665  
P. formosa (A0A087XK69) /1-665  
A. mexicanus (W5LF12) /1-668  
G. gallus (F1NSC4) /1-671  
F. albicollis (U3KCM6) /1-645  
M. domestica (F6X9H5) /1-684  
R. norvegicus (Q4QR83) /1-670  
M. musculus (070491) /1-670  
H. glaber (G5BRG2) /1-662  
C. porcellus (H0VUR2) /1-671  
C. familiaris (J9NW10) /1-655  
L. africana (G37653) /1-669  
O. garnettii (H0X180) /1-707  
P. anubis (A0A096MM01) /1-704  
C. sabaueus (A0A09RNU1) /1-659  
M. mulatta (F7GR11) /1-667  
M. fascicularis (G7P935) /1-667  
G. Gorilla (G3R6K2) /1-707  
P. abelli (Q5R7B4) /1-667  
B. taurus (F1N406) /1-668  
P. alecto (L5JW03) /1-658  
E. caballus (F626X7) /1-667

40 FHICIAAIIILVVMVLIILARRRQKI--SDNRQLTGLIIVFNLDHTQHKGLAVAVYGVLFCKLVGMVLSHHPLEPTKEVAN-----KEFWMLLALYLY 131  
52 YHACLASLIIIVLLIILAVLRVRRQLWPCDVRGRGRLPVDVLAGDRPRAVPAVAVFVLSLCLLDPEDLFFLTLASAPSDQKTEAPRGAWKLGLGFY 154  
44 YHCTIAAIIIVLLIILAVLRVRRQLWPCDVRGRGRLPVDVLAGDRPRAVPAVAVFVLSLCLLDPEDLFFLTLASAPSDQKTEAPRGAWKLGLGFY 138  
32 YHICTVILVLLVLIILAVLRARMKV--GDRKGLPGLIPVFNLDHTQHKGLAVAVYGVLFCKLVGMVLSHHPLEPTKEVAN-----KEFWMLLALYLY 123  
38 YHICTVILVLLIILAVLRARMKV--GDRKGLPGLIPVFNLDHTQHKGLAVAVYGVLFCKLVGMVLSHHPLEPTKEVAN-----KEFWMLLALYLY 129  
38 YHICTVILVLLIILAVLRARMKV--GDRKGLPGLIPVFNLDHTQHKGLAVAVYGVLFCKLVGMVLSHHPLEPTKEVAN-----KEFWMLLALYLY 129  
41 YHICTVILVLLIILAVLRARMKV--GDRKGLPGLIPVFNLDHTQHKGLAVAVYGVLFCKLVGMVLSHHPLEPTKEVAN-----KEFWMLLALYLY 132  
58 YHCTMPTIILVLLIILAVLRVRRQLWPCDVRGRGRLPVDVLAGDRPRAVPAVAVFVLSLCLLDPEDLFFLTLASAPSDQKTEAPRGAWKLGLGFY 152  
33 YHCTMPTIILVLLIILAVLRVRRQLWPCDVRGRGRLPVDVLAGDRPRAVPAVAVFVLSLCLLDPEDLFFLTLASAPSDQKTEAPRGAWKLGLGFY 127  
73 YHCTMPTIILVLLIILAVLRVRRQLWPCDVRGRGRLPVDVLAGDRPRAVPAVAVFVLSLCLLDPEDLFFLTLASAPSDQKTEAPRGAWKLGLGFY 167  
44 YHCTMPTIILVLLIILAVLRVRRQLWPCDVRGRGRLPVDVLAGDRPRAVPAVAVFVLSLCLLDPEDLFFLTLASAPSDQKTEAPRGAWKLGLGFY 138  
52 YHACLAVLIIIVLLIILAVLRVRRQLWPCDVRGRGRLPVDVLAGDRPRAVPAVAVFVLSLCLLDPEDLFFLTLASAPSDQKTEAPRGAWKLGLGFY 154  
51 YHACLAVLIIIVLLIILAVLRVRRQLWPCDVRGRGRLPVDVLAGDRPRAVPAVAVFVLSLCLLDPEDLFFLTLASAPSDQKTEAPRGAWKLGLGFY 153  
50 YHACLAVLIIIVLLIILAVLRVRRQLWPCDVRGRGRLPVDVLAGDRPRAVPAVAVFVLSLCLLDPEDLFFLTLASAPSDQKTEAPRGAWKLGLGFY 152  
51 YHACLAVLIIIVLLIILAVLRVRRQLWPCDVRGRGRLPVDVLAGDRPRAVPAVAVFVLSLCLLDPEDLFFLTLASAPSDQKTEAPRGAWKLGLGFY 153  
51 YHACLAVLIIIVLLIILAVLRVRRQLWPCDVRGRGRLPVDVLAGDRPRAVPAVAVFVLSLCLLDPEDLFFLTLASAPSDQKTEAPRGAWKLGLGFY 153  
93 YHACLAVLIIIVLLIILAVLRVRRQLWPCDVRGRGRLPVDVLAGDRPRAVPAVAVFVLSLCLLDPEDLFFLTLASAPSDQKTEAPRGAWKLGLGFY 154  
97 YHACLAVLIIIVLLIILAVLRVRRQLWPCDVRGRGRLPVDVLAGDRPRAVPAVAVFVLSLCLLDPEDLFFLTLASAPSDQKTEAPRGAWKLGLGFY 154  
52 YHACLAVLIIIVLLIILAVLRVRRQLWPCDVRGRGRLPVDVLAGDRPRAVPAVAVFVLSLCLLDPEDLFFLTLASAPSDQKTEAPRGAWKLGLGFY 154  
52 YHACLAVLIIIVLLIILAVLRVRRQLWPCDVRGRGRLPVDVLAGDRPRAVPAVAVFVLSLCLLDPEDLFFLTLASAPSDQKTEAPRGAWKLGLGFY 154  
92 YHACLAVLIIIVLLIILAVLRVRRQLWPCDVRGRGRLPVDVLAGDRPRAVPAVAVFVLSLCLLDPEDLFFLTLASAPSDQKTEAPRGAWKLGLGFY 154  
52 YHACLAVLIIIVLLIILAVLRVRRQLWPCDVRGRGRLPVDVLAGDRPRAVPAVAVFVLSLCLLDPEDLFFLTLASAPSDQKTEAPRGAWKLGLGFY 154  
53 YHCTMPTIILVLLIILAVLRVRRQLWPCDVRGRGRLPVDVLAGDRPRAVPAVAVFVLSLCLLDPEDLFFLTLASAPSDQKTEAPRGAWKLGLGFY 155  
51 YHACLAVLIIIVLLIILAVLRVRRQLWPCDVRGRGRLPVDVLAGDRPRAVPAVAVFVLSLCLLDPEDLFFLTLASAPSDQKTEAPRGAWKLGLGFY 145  
52 YHCTMPTIILVLLIILAVLRVRRQLWPCDVRGRGRLPVDVLAGDRPRAVPAVAVFVLSLCLLDPEDLFFLTLASAPSDQKTEAPRGAWKLGLGFY 155

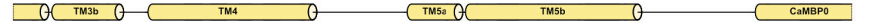

D. rerio (A4IG66) /1-670  
H. sapiens (Q9XK79) /1-667  
L. oculatus (W5NCL1) /1-664  
O. niloticus (I3KE07) /1-658  
X. maculatus (M4AN84) /1-665  
P. formosa (A0A087XK69) /1-665  
A. mexicanus (W5LF12) /1-668  
G. gallus (F1NSC4) /1-671  
F. albicollis (U3KCM6) /1-645  
M. domestica (F6X9H5) /1-684  
R. norvegicus (Q4QR83) /1-670  
M. musculus (070491) /1-670  
H. glaber (G5BRG2) /1-662  
C. porcellus (H0VUR2) /1-671  
C. familiaris (J9NW10) /1-655  
L. africana (G37653) /1-669  
O. garnettii (H0X180) /1-707  
P. anubis (A0A096MM01) /1-704  
C. sabaueus (A0A09RNU1) /1-659  
M. mulatta (F7GR11) /1-667  
M. fascicularis (G7P935) /1-667  
G. Gorilla (G3R6K2) /1-707  
P. abelli (Q5R7B4) /1-667  
B. taurus (F1N406) /1-668  
P. alecto (L5JW03) /1-658  
E. caballus (F626X7) /1-667

132 PTLYYPLAACGTLHNKGVYVLSLSSWTFHGLVWQKVDKPTPIYRYVAFVLSLPOIACLAFLAFVPLLLFKLQNTETANESDSSYYRDKVILK 234  
155 AALYYPLAACATGAGTAAHLLSSTLSWAHLGVQWQRAECPQPKYRYVLSLASELLGLGFLVWVPLVRSFSRRTG--AGSKGQSSYSEYLRNLIC 256  
139 PLYYPLAACGTLHNKGVYVLSLSSWTFHGLVWQKVDKPTPIYRYVLSLPOIACLAFLAFVPLLLFKLQNTETANESDSSYYRDKVILK 241  
124 PLYYPLAACGTLHNKGVYVLSLSSWTFHGLVWQKVDKPTPIYRYVLSLPOIACLAFLAFVPLLLFKLQNTETANESDSSYYRDKVILK 232  
130 PLYYPLAACGTLHNKGVYVLSLSSWTFHGLVWQKVDKPTPIYRYVLSLPOIACLAFLAFVPLLLFKLQNTETANESDSSYYRDKVILK 232  
130 PTLYYPLAACGTLHNKGVYVLSLSSWTFHGLVWQKVDKPTPIYRYVLSLPOIACLAFLAFVPLLLFKLQNTETANESDSSYYRDKVILK 232  
133 PLYYPLAACGTLHNKGVYVLSLSSWTFHGLVWQKVDKPTPIYRYVLSLPOIACLAFLAFVPLLLFKLQNTETANESDSSYYRDKVILK 235  
153 PLYYPLAACATVGHRAAHLISLSSWTFHGLVWQKVDKPTPIYRYVLSLPOIACLAFLAFVPLLLFKLQNTETANESDSSYYRDKVILK 235  
128 PVFYSPLAACGTPRHRLGYGAVLLAARCAHGLHRLDQKPTLPIYRYVLSLASELLGLGFLVWVPLVRSFSRRTG--AGSKGQSSYSEYLRNLIC 229  
168 PLYYPLAACATVGHRAAHLISLSSWTFHGLVWQKVDKPTPIYRYVLSLASELLGLGFLVWVPLVRSFSRRTG--AGSKGQSSYSEYLRNLIC 229  
155 PLYYPLAACATVGHRAAHLISLSSWTFHGLVWQKVDKPTPIYRYVLSLASELLGLGFLVWVPLVRSFSRRTG--AGSKGQSSYSEYLRNLIC 229  
155 PLYYPLAACATVGHRAAHLISLSSWTFHGLVWQKVDKPTPIYRYVLSLASELLGLGFLVWVPLVRSFSRRTG--AGSKGQSSYSEYLRNLIC 229  
146 PLYYPLAACATVGHRAAHLISLSSWTFHGLVWQKVDKPTPIYRYVLSLASELLGLGFLVWVPLVRSFSRRTG--AGSKGQSSYSEYLRNLIC 229  
154 PLYYPLAACATVGHRAAHLISLSSWTFHGLVWQKVDKPTPIYRYVLSLASELLGLGFLVWVPLVRSFSRRTG--AGSKGQSSYSEYLRNLIC 225  
153 PLYYPLAACATVGHRAAHLISLSSWTFHGLVWQKVDKPTPIYRYVLSLASELLGLGFLVWVPLVRSFSRRTG--AGSKGQSSYSEYLRNLIC 225  
154 PLYYPLAACATVGHRAAHLISLSSWTFHGLVWQKVDKPTPIYRYVLSLASELLGLGFLVWVPLVRSFSRRTG--AGSKGQSSYSEYLRNLIC 225  
195 AALYYPLAACATVGHRAAHLISLSSWTFHGLVWQKVDKPTPIYRYVLSLASELLGLGFLVWVPLVRSFSRRTG--AGSKGQSSYSEYLRNLIC 224  
192 AALYYPLAACATVGHRAAHLISLSSWTFHGLVWQKVDKPTPIYRYVLSLASELLGLGFLVWVPLVRSFSRRTG--AGSKGQSSYSEYLRNLIC 224  
147 AALYYPLAACATVGHRAAHLISLSSWTFHGLVWQKVDKPTPIYRYVLSLASELLGLGFLVWVPLVRSFSRRTG--AGSKGQSSYSEYLRNLIC 224  
155 AALYYPLAACATVGHRAAHLISLSSWTFHGLVWQKVDKPTPIYRYVLSLASELLGLGFLVWVPLVRSFSRRTG--AGSKGQSSYSEYLRNLIC 226  
155 AALYYPLAACATVGHRAAHLISLSSWTFHGLVWQKVDKPTPIYRYVLSLASELLGLGFLVWVPLVRSFSRRTG--AGSKGQSSYSEYLRNLIC 226  
195 AALYYPLAACATVGHRAAHLISLSSWTFHGLVWQKVDKPTPIYRYVLSLASELLGLGFLVWVPLVRSFSRRTG--AGSKGQSSYSEYLRNLIC 226  
155 AALYYPLAACATVGHRAAHLISLSSWTFHGLVWQKVDKPTPIYRYVLSLASELLGLGFLVWVPLVRSFSRRTG--AGSKGQSSYSEYLRNLIC 226  
156 PLYYPLAACATVGHRAAHLISLSSWTFHGLVWQKVDKPTPIYRYVLSLASELLGLGFLVWVPLVRSFSRRTG--AGSKGQSSYSEYLRNLIC 227  
146 PLYYPLAACATVGHRAAHLISLSSWTFHGLVWQKVDKPTPIYRYVLSLASELLGLGFLVWVPLVRSFSRRTG--AGSKGQSSYSEYLRNLIC 227  
155 PLYYPLAACATVGHRAAHLISLSSWTFHGLVWQKVDKPTPIYRYVLSLASELLGLGFLVWVPLVRSFSRRTG--AGSKGQSSYSEYLRNLIC 226

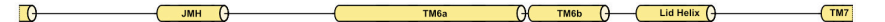

D. rerio (A4IG66) /1-670  
H. sapiens (Q9XK79) /1-667  
L. oculatus (W5NCL1) /1-664  
O. niloticus (I3KE07) /1-658  
X. maculatus (M4AN84) /1-665  
P. formosa (A0A087XK69) /1-665  
A. mexicanus (W5LF12) /1-668  
G. gallus (F1NSC4) /1-671  
F. albicollis (U3KCM6) /1-645  
M. domestica (F6X9H5) /1-684  
R. norvegicus (Q4QR83) /1-670  
M. musculus (070491) /1-670  
H. glaber (G5BRG2) /1-662  
C. porcellus (H0VUR2) /1-671  
C. familiaris (J9NW10) /1-655  
L. africana (G37653) /1-669  
O. garnettii (H0X180) /1-707  
P. anubis (A0A096MM01) /1-704  
C. sabaueus (A0A09RNU1) /1-659  
M. mulatta (F7GR11) /1-667  
M. fascicularis (G7P935) /1-667  
G. Gorilla (G3R6K2) /1-707  
P. abelli (Q5R7B4) /1-667  
B. taurus (F1N406) /1-668  
P. alecto (L5JW03) /1-658  
E. caballus (F626X7) /1-667

235 KKKPKTIS--SSTSKPKLFDRLDAVKSYYIPEDEFRFLKLAIVVVFIALYVMAILLISGVLPFLHIVRRVDENIAFLLAGNIIILN-----DROEV 330  
257 RKKLGS--S-YHTSKHGLSWARVLRHCITVPPQGRFLPLKLVLSATLTGTATVYVALLLVGVVTTQKVRAGVITDVSYLLAGGIVLVE-----DROEV 351  
242 RKKLGS--S-SCYATLISARILLESYIYIPEDEFRFLKLAIVVVFIALYVMAILLISGVLPFLHIVRRVDENIAFLLAGNIIILN-----DROEV 326  
227 KKKPKTIS--SSTSKPKLFDRLDAVKSYYIPEDEFRFLKLAIVVVFIALYVMAILLISGVLPFLHIVRRVDENIAFLLAGNIIILN-----DROEV 326  
233 EKTSSKVSSTSDPKPKLQRTDAVRSYIYIPEDEFRFLKLAIVVVFIALYVMAILLISGVLPFLHIVRRVDENIAFLLAGNIIILN-----DROEV 329  
233 EKTSSKVSSTSDPKPKLQRTDAVRSYIYIPEDEFRFLKLAIVVVFIALYVMAILLISGVLPFLHIVRRVDENIAFLLAGNIIILN-----DROEV 329  
236 KKKPSQ--SSRPPKLSERIISDAFKSYIYIPEDEFRFLKLAIVVVFIALYVMAILLISGVLPFLHIVRRVDENIAFLLAGNIIILN-----DROEV 328  
256 RRLQKQ--S-TPKLEESLVSRLLVYCSYIYIPEDEFRFLKLAIVVVFIALYVMAILLISGVLPFLHIVRRVDENIAFLLAGNIIILN-----DROEV 358  
230 RKRGRK--S-SAKIEESLWSRIRSYLLSYIYIPEDEFRFLKLAIVVVFIALYVMAILLISGVLPFLHIVRRVDENIAFLLAGNIIILN-----DROEV 329  
271 RKRGRK--S-SVAVSPPFRILYFLSHHSRGRFLPLKLVLSATLTGTATVYVALLLVGVVTTQKVRAGVITDVSYLLAGGIVLVE-----DROEV 365  
294 RKKLGS--S-YHTSKHGLSWARVLRHCITVPPQGRFLPLKLVLSATLTGTATVYVALLLVGVVTTQKVRAGVITDVSYLLAGGIVLVE-----DROEV 352  
257 PKLSDCS--HPAKSRLSRAWAFSHHSYIYIPEDEFRFLKLAIVVVFIALYVMAILLISGVLPFLHIVRRVDENIAFLLAGNIIILN-----DROEV 352  
248 RKPQGG--R-SYHTKQSLRSRAWYFSRHYIYIPEDEFRFLKLAIVVVFIALYVMAILLISGVLPFLHIVRRVDENIAFLLAGNIIILN-----DROEV 342  
256 RKKPGWS--CHTSKQGLSRAWCSQRYIYIPEDEFRFLKLAIVVVFIALYVMAILLISGVLPFLHIVRRVDENIAFLLAGNIIILN-----DROEV 351  
255 RKKLAS--S-SRASKHGLSRAWYSRNYIYIPEDEFRFLKLAIVVVFIALYVMAILLISGVLPFLHIVRRVDENIAFLLAGNIIILN-----DROEV 349  
256 RKKLGS--S-SHTSKHGLSQAQWICFRHHIYIYIPEDEFRFLKLAIVVVFIALYVMAILLISGVLPFLHIVRRVDENIAFLLAGNIIILN-----DROEV 350  
295 RKKLET--S-SHTSKHGLSQAQWICFRHHIYIYIPEDEFRFLKLAIVVVFIALYVMAILLISGVLPFLHIVRRVDENIAFLLAGNIIILN-----DROEV 389  
294 RKKLGS--S-SHTSKHGLSQAQWICFRHHIYIYIPEDEFRFLKLAIVVVFIALYVMAILLISGVLPFLHIVRRVDENIAFLLAGNIIILN-----DROEV 389  
249 RKKLGS--S-SHTSKHGLSQAQWICFRHHIYIYIPEDEFRFLKLAIVVVFIALYVMAILLISGVLPFLHIVRRVDENIAFLLAGNIIILN-----DROEV 343  
257 RKKLGS--S-SHTSKHGLSQAQWICFRHHIYIYIPEDEFRFLKLAIVVVFIALYVMAILLISGVLPFLHIVRRVDENIAFLLAGNIIILN-----DROEV 351  
257 RKKLGS--S-SHTSKHGLSQAQWICFRHHIYIYIPEDEFRFLKLAIVVVFIALYVMAILLISGVLPFLHIVRRVDENIAFLLAGNIIILN-----DROEV 351  
297 RKKLGS--S-YHTSKHGLSQAQWICFRHHIYIYIPEDEFRFLKLAIVVVFIALYVMAILLISGVLPFLHIVRRVDENIAFLLAGNIIILN-----DROEV 391  
257 RKKLGS--S-SHTSKHGLSQAQWICFRHHIYIYIPEDEFRFLKLAIVVVFIALYVMAILLISGVLPFLHIVRRVDENIAFLLAGNIIILN-----DROEV 351  
258 RKKLGS--S-SHTSKHGLSQAQWICFRHHIYIYIPEDEFRFLKLAIVVVFIALYVMAILLISGVLPFLHIVRRVDENIAFLLAGNIIILN-----DROEV 352  
248 RKKLGS--S-SHTSKHGLSQAQWICFRHHIYIYIPEDEFRFLKLAIVVVFIALYVMAILLISGVLPFLHIVRRVDENIAFLLAGNIIILN-----DROEV 342  
257 RKKLGS--S-SHTSKHGLSQAQWICFRHHIYIYIPEDEFRFLKLAIVVVFIALYVMAILLISGVLPFLHIVRRVDENIAFLLAGNIIILN-----DROEV 351





(65). Residues are colored by their physicochemical properties using a modified version of the Zappo scheme: aliphatic residues (I, L, V, A & M) are in salmon, aromatics (F, W & Y) in orange, positively charged (K, R & H) in blue, negatively charged (D, E) in red, polars (S, T, N, Q) in green, G in magenta, P in cyan, C in yellow. Secondary structure elements are labeled and displayed above the alignment, in yellow. Solid and dotted indicate regions of the protein, which are visible and disordered in the structure, respectively.



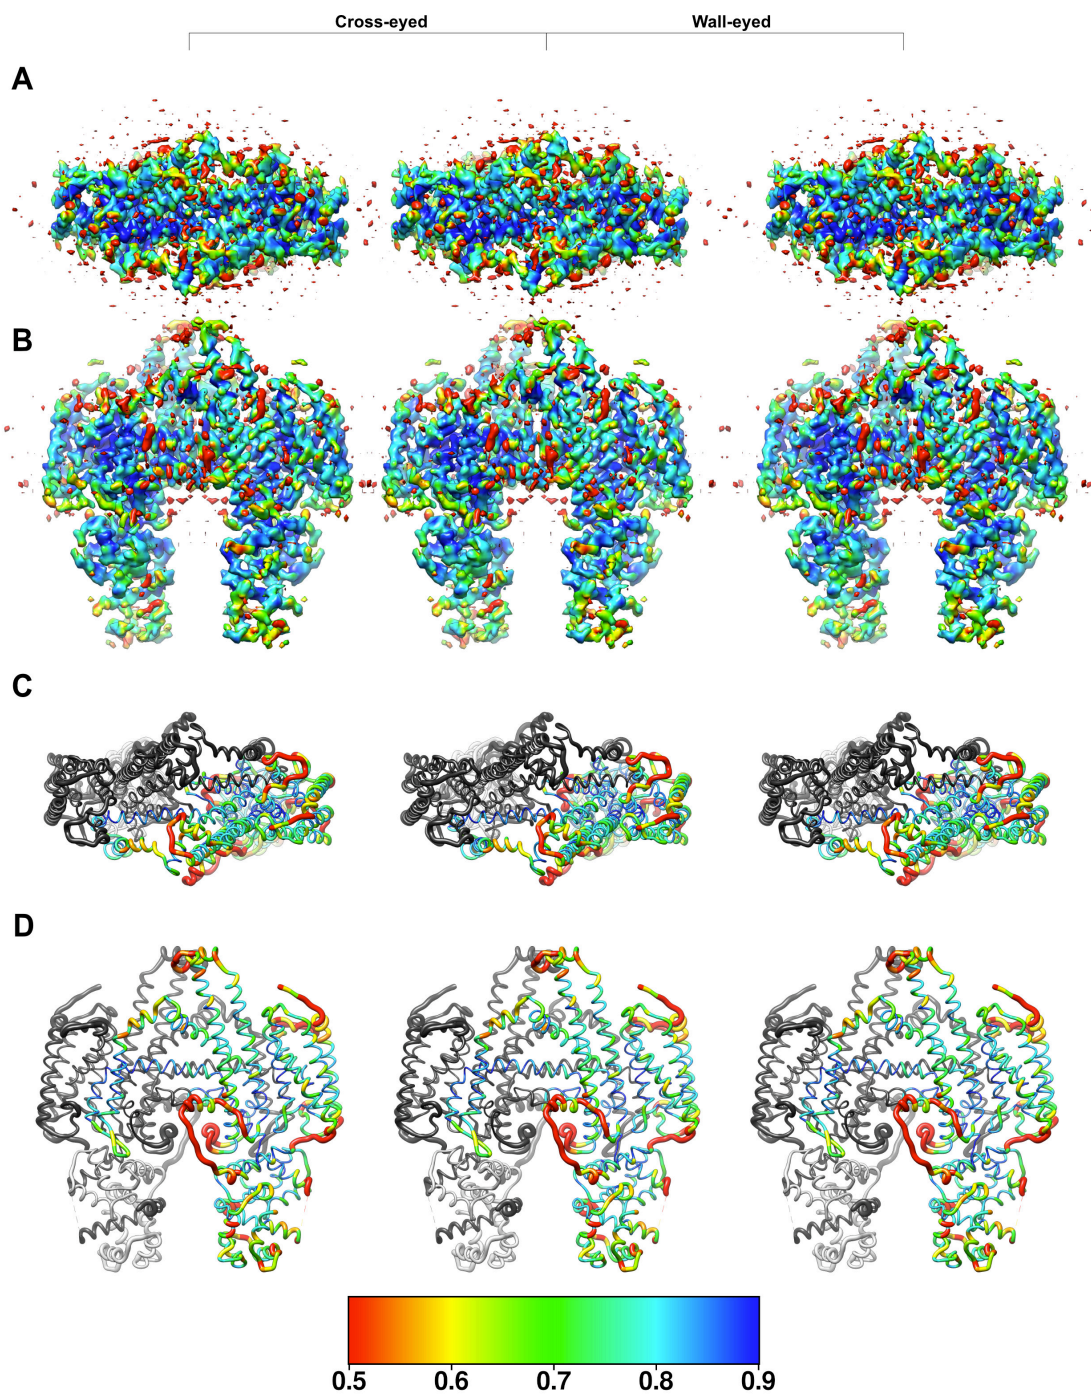

**Fig. S8. Correlation between the STRA6 model and the density map.** All panels are represented in stereo as indicated. The same color key is used for all panels and is reproduced at the bottom of the page. **(A and B)** Two views of the experimental density map, contoured at 6XR.M.S and colored by local correlation with a synthetic density map generated using *phenix.model\_map* (version 1.10.1-dev-2427) from a model with B-factors estimated using *phenix.real\_space\_refine*. The synthetic map had the same sharpening B-factor applied as was used in post-processing of the cryo-EM map. Local correlation was calculated in a 5 voxel sliding window using the “*vop localcorrelation*” command in UCSF Chimera. **(C**

and **D)** Two views of the STRA6-CaM atomic model, with one protomer colored by the local correlation of each residue, averaged over the atomic positions. The radius of the backbone trace is inversely proportional to the correlation, such that a thicker trace indicates lower correlation with the experimental map.

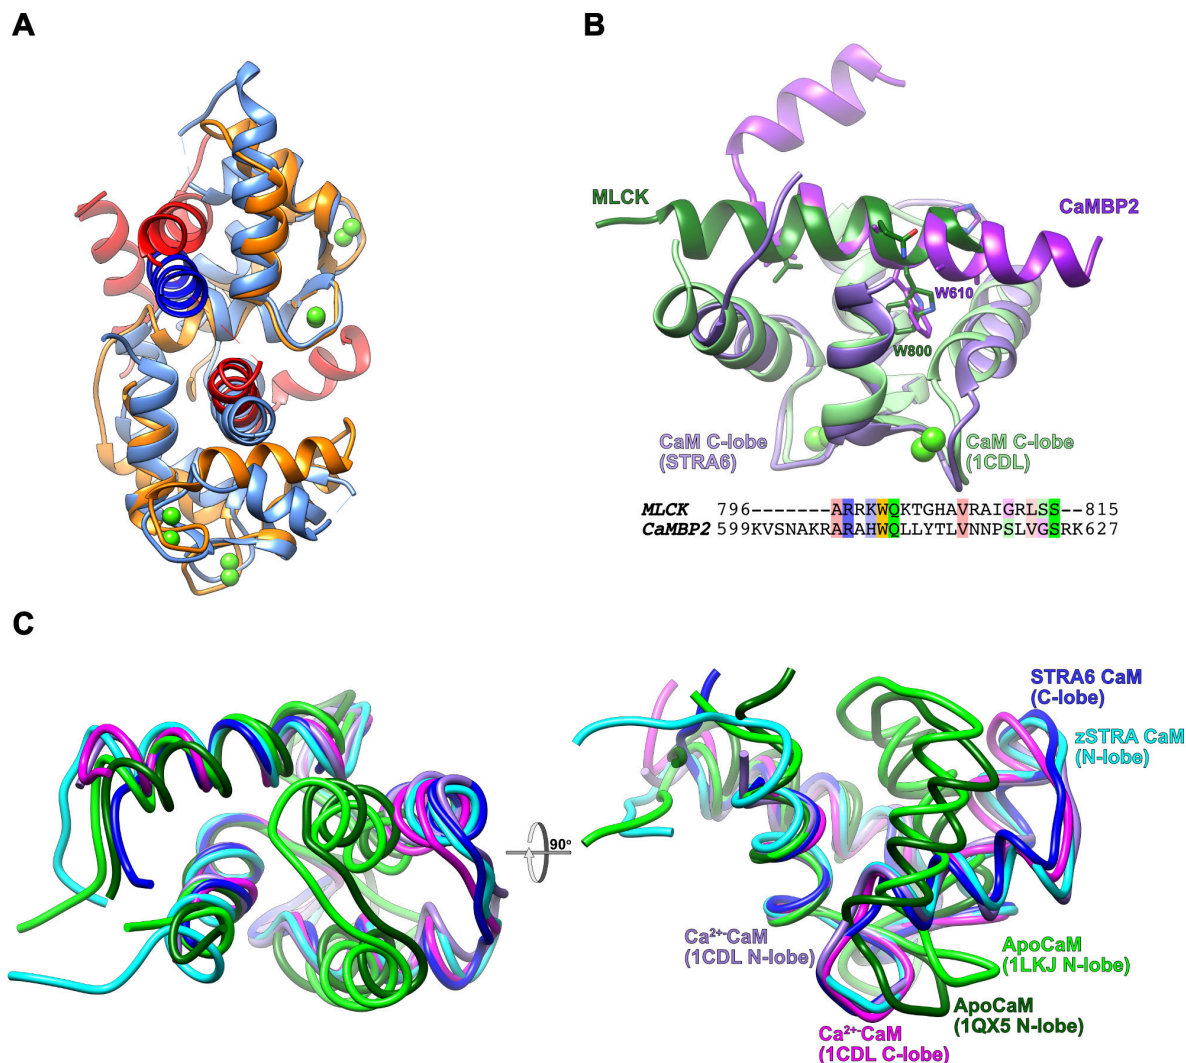

**Fig. S9. Comparison of STRA6 bound CaM to other EF hand proteins and prior CaM structures.** (A) The  $\alpha$  trace of the structure of CaM (orange) bound to the three STRA6 peptides (red) is shown superimposed on the nearest match in the PDB (light/dark blue; PDB accession code: 3L19).  $\text{Ca}^{2+}$ -ions are represented as green spheres. (B) Superposition of the C-lobe of CaM bound to STRA6 CaMBP2, in light and dark purple respectively, with the complex of the MLCK target peptide and the C-lobe of  $\text{Ca}^{2+}$ -CaM (PDB accession code: 1CDL), in light and dark green respectively. Structurally homologous residues are shown in stick representation. A structure-based sequence alignment of the MLCK target peptide with CaMBP2 is shown below the structural superposition. (C) A superposition of the N- and C-lobes of CaM from the STRA6-CaM complex, displayed in cyan and blue respectively, with the N- and C-lobes from a  $\text{Ca}^{2+}$ -CaM structure (PDB accession code: 1CDL) in light purple and magenta respectively, and with two independent apo-CaM structures, the N-lobe of PDB accession code 1LKJ and the N-lobe of PDB accession code 1QX5, in light and dark green respectively.



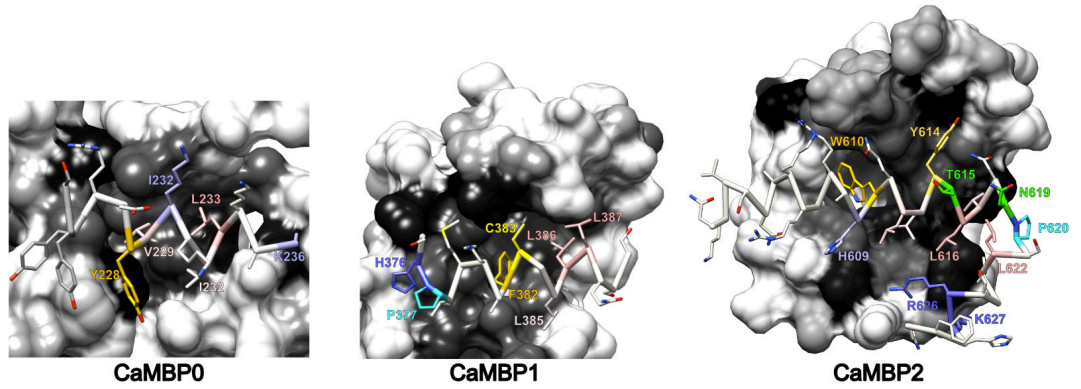

|                                 | CaMBP0                 | CaMBP1                   | CaMBP2                                   |
|---------------------------------|------------------------|--------------------------|------------------------------------------|
| <i>D. rerio</i> (A4IGB6)        | 223 SYYRDVVKILKKK 236  | 375 SHPVMKAFCGLLQSS 390  | 599 KVS--NAKRARAHWQLLYTLVNNPSLVGSRK 627  |
| <i>H. sapiens</i> (Q9BX79)      | 245 SYSEYLRNLLCRK 258  | 396 SHPAMTAFCSLLLQQA 411 | 626 KGARPGASRGRARWGLAYTLLEHPTLVQVFRK 656 |
| <i>L. oculatus</i> (W5NCL1)     | 230 SYYKDVKEILKKK 243  | 381 SHPVMKAFCGVLLQSP 396 | 605 KLS--NSRRARARWLLLETLVNNPSLVASRK 633  |
| <i>O. niloticus</i> (I3KE07)    | 215 SYYRDVVKMLNKK 228  | 368 SHPVMKAFCGMLLQSV 383 | 592 KVS--IAKRARRHWQLLYTLVNNPSLVGTRK 620  |
| <i>X. maculatus</i> (M4AN84)    | 221 SYYRDVVKITLYEK 234 | 374 SHPVMKAFCGILLQSL 389 | 598 KVS--SAKRARMHWQLLYTLVNNPSLVGTRK 626  |
| <i>P. formosa</i> (A0A087XK69)  | 221 SYYRDVVKISLYEK 234 | 374 SHPVMKAFCGILLQSL 389 | 598 KVS--SAKRARMHWQLLYTLVNNPSLVGTRK 626  |
| <i>A. mexicanus</i> (W5LF12)    | 224 SYYRDVVKILKKK 237  | 373 SHPVMKAFCGILLQAP 388 | 597 KPV--SNGKRARGHWLLYTLVNNPSLVGSRK 626  |
| <i>G. gallus</i> (F1NSC4)       | 244 GYYKYLKAVLSRR 257  | 401 SHPLMRAFCLLLLQPT 416 | 625 GGG--RLKRSRARWVWVAYTLLEHPSLMGCRK 653 |
| <i>F. albicollis</i> (U3KCM6)   | 218 SYYRKYKAVLSRR 231  | 375 CHPLLKAFCFLLQPG 390  | 599 GRA--RIRRRARWVWVAYTLLEHPSLTASRK 627  |
| <i>M. domestica</i> (F6X9H5)    | 259 SYEYLRHILSGK 272   | 410 SHPAMRAFCFLLQLP 425  | 638 NAT--RSRQSRIRWGLAYTLLEHPSLTFPRK 666  |
| <i>R. norvegicus</i> (Q4QR83)   | 245 SYSEKYLKALLCPK 258 | 397 SHPGVIAFCALLLHVP 412 | 627 KGAGPKGSRGRARWGLAYTLLEHPSLQAFRK 657  |
| <i>M. musculus</i> (O70491)     | 245 SYSEKYLKALLCPK 258 | 397 SHPGVIAFCALLLHVP 412 | 627 KGAGPKGSRGRARWGLAYTLLEHPSLQAFRK 657  |
| <i>H. glaber</i> (G5BRG2)       | 236 RDSKYLRSLLCRK 249  | 387 SHPAMTAFCALLLEVQ 402 | 619 KAAGLRAGRSWARWGVAYTLLEHPPKKAARK 649  |
| <i>C. porcellus</i> (H0VUR2)    | 244 SDTEEYKLSLLCRK 257 | 396 SHPAVTAFCALLLGAR 411 | 628 KAAGLRAGRSWARWGVAYTLLEHPPKKAARK 649  |
| <i>O. garnettii</i> (J9NWI0)    | 243 SYSEDYLRLLCRK 256  | 394 SHPATTAFCFLLLRTR 409 | 619 RGVGSRARQGRARWGLAYTLLEHPPKKAARK 649  |
| <i>L. africana</i> (G3T6S3)     | 244 SYSEYLRVLLRRK 257  | 395 SHPAVTAFCFLLLRGR 410 | 626 KGAGPRASHGRARWGLAYTLLEHPPKKAARK 649  |
| <i>O. garnettii</i> (H0XI80)    | 283 RYSEYLRNLLCRK 296  | 434 SHPAMTAFCTLLLOAR 449 | 664 KGARPRVSRGRARWGLAYTLLEHPPKKAARK 694  |
| <i>P. anubis</i> (A0A096NMQ1)   | 282 SYSEYLRNLLCRK 295  | 433 SHPAMTAFCTLLLOAR 448 | 663 KGARPRASRCRARWGLAYTLLEHPPKKAARK 693  |
| <i>C. sabaetus</i> (A0A099RNU1) | 237 SYSEYLRNLLCRK 250  | 388 SHPATTAFCFLLLOAR 403 | 618 KGARPRASRCRARWGLAYTLLEHPPKKAARK 648  |
| <i>M. mulatta</i> (F7GR11)      | 245 SYSEYLRNLLCRK 258  | 396 SHPAMTAFCTLLLOAR 411 | 626 KGARPRASRCRARWGLAYTLLEHPPKKAARK 656  |
| <i>M. fascicularis</i> (G7P935) | 245 SYSEYLRNLLCRK 258  | 396 SHPAMTAFCTLLLOAR 411 | 626 KGARPRASRCRARWGLAYTLLEHPPKKAARK 656  |
| <i>G. gorilla</i> (G3R6K2)      | 285 SYSEYLRNLLCRK 298  | 436 SHPAMTAFCSLLLQQA 451 | 666 KGARPRASRCRARWGLAYTLLEHPPKKAARK 696  |
| <i>P. abelli</i> (Q5R7B4)       | 245 SYSEYLRNLLCRK 258  | 396 SHPAMTAFCSLLLQQA 411 | 626 KGARPRANRGRARWGLAYTLLEHPPKKAARK 656  |
| <i>B. taurus</i> (FIN4Q6)       | 246 SYSEYLRLLCRK 259   | 397 SHPAMTAFCSLLLRTQ 412 | 625 KGARPRARQGRARWGLAYTLLEHPPKKAARK 655  |
| <i>P. alecto</i> (L5JW03)       | 236 SYPEEYLRLLCRK 249  | 387 SHPAMITFCALLLRTQ 402 | 615 KGTGPRARQGRARWGLAYTLLEHPPKKAARK 645  |
| <i>E. caballus</i> (F6Z6X7)     | 245 SYSEYLRLLCRK 258   | 396 SHPAMTAFCSLLLRTQ 411 | 624 KGARPRARHGRARWGLAYTLLEHPPKKAARK 654  |

**Fig. S10. Molecular details of the STRA6-CaM interaction.** Separate views of the three CaM-binding peptides of STRA6 represented as  $\text{C}\alpha$  traces with side chains shown in stick, overlaid over a hydrophobic surface colored according to the Kyte-Doolittle hydrophobicity scale (71) from white (-4.5, most polar) to black (4.5, most hydrophobic). For CaMBP0, CaMBP1 is also represented as part of the hydrophobic surface, as it forms part of the CaMBP0-binding cleft.

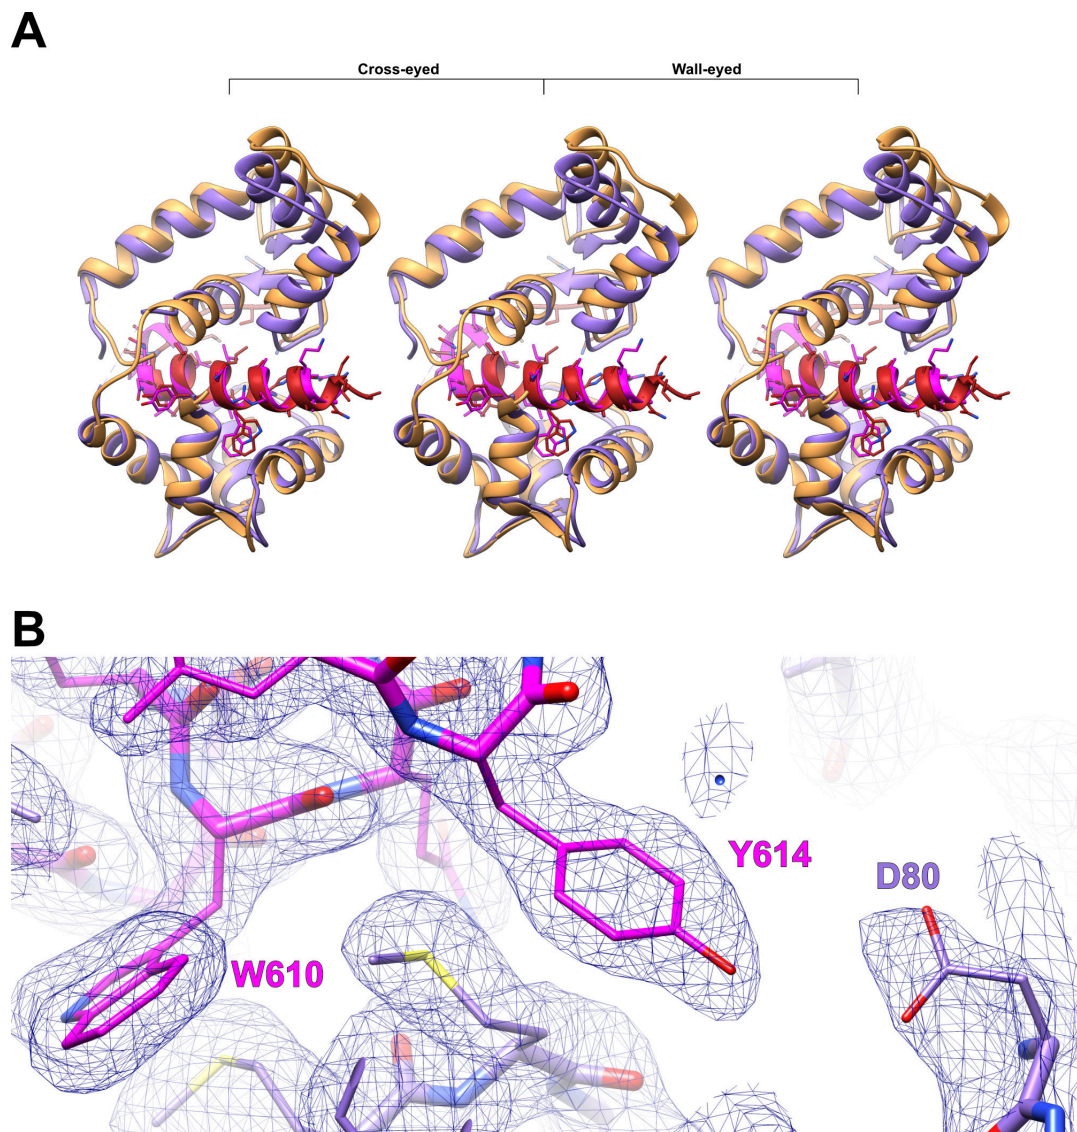

**Fig. S11. Crystal Structure of CaM-CaMBP2.** (A) Stereo representation of an overlay of the CaM-CaMBP2 crystal structure (in purple and magenta, respectively) and the corresponding region of the STRA6-CaM cryo-EM structure (in dark red, and gold, respectively). (B) Representative region of the 2Fo-Fc electron density map of the CaM-CaMBP2 crystal structure contoured at 1 x R.M.S.

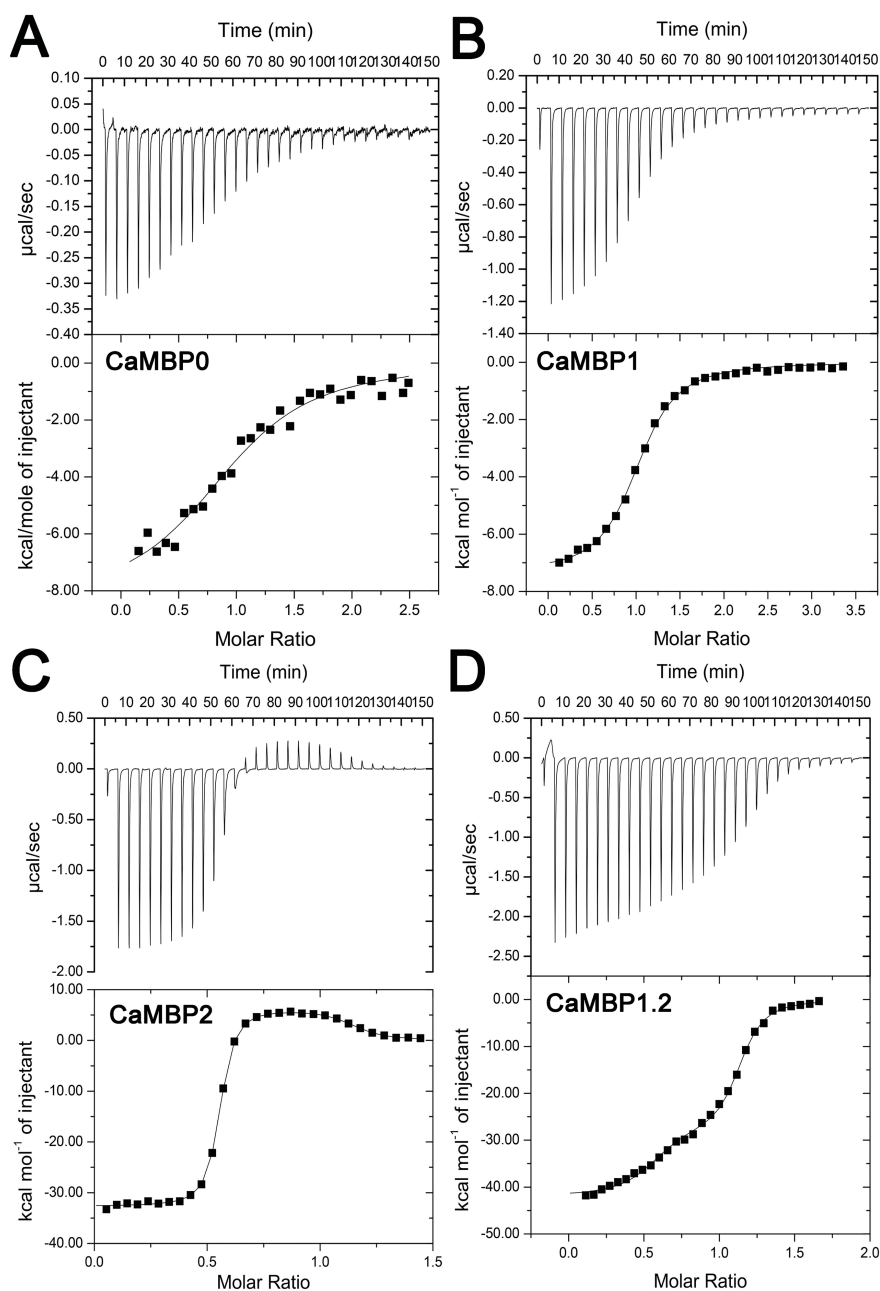

**Fig. S12. ITC thermograms of STRA6 peptides – CaM interactions.**

Representative ITC thermograms for the reversed titrations used to observe CaM interactions with STRA6 peptides: CaM interaction with (A) CaMBP0, (B) CaMBP1, (C) CaMBP2, and (D) CaMBP1.2 under calcium-loaded conditions. All experiments were performed in 20 mM HEPES, pH 7.4, 50 mM NaCl, 10 mM CaCl<sub>2</sub>, 5 mM MgCl<sub>2</sub>, and 0.5 mM TCEP at 37°C. CaMBP1 titrations into CaM were not performed, because the peptide aggregated at concentrations greater 0.1 mM in aqueous solutions due to its hydrophobicity, preventing its use as a titrant.

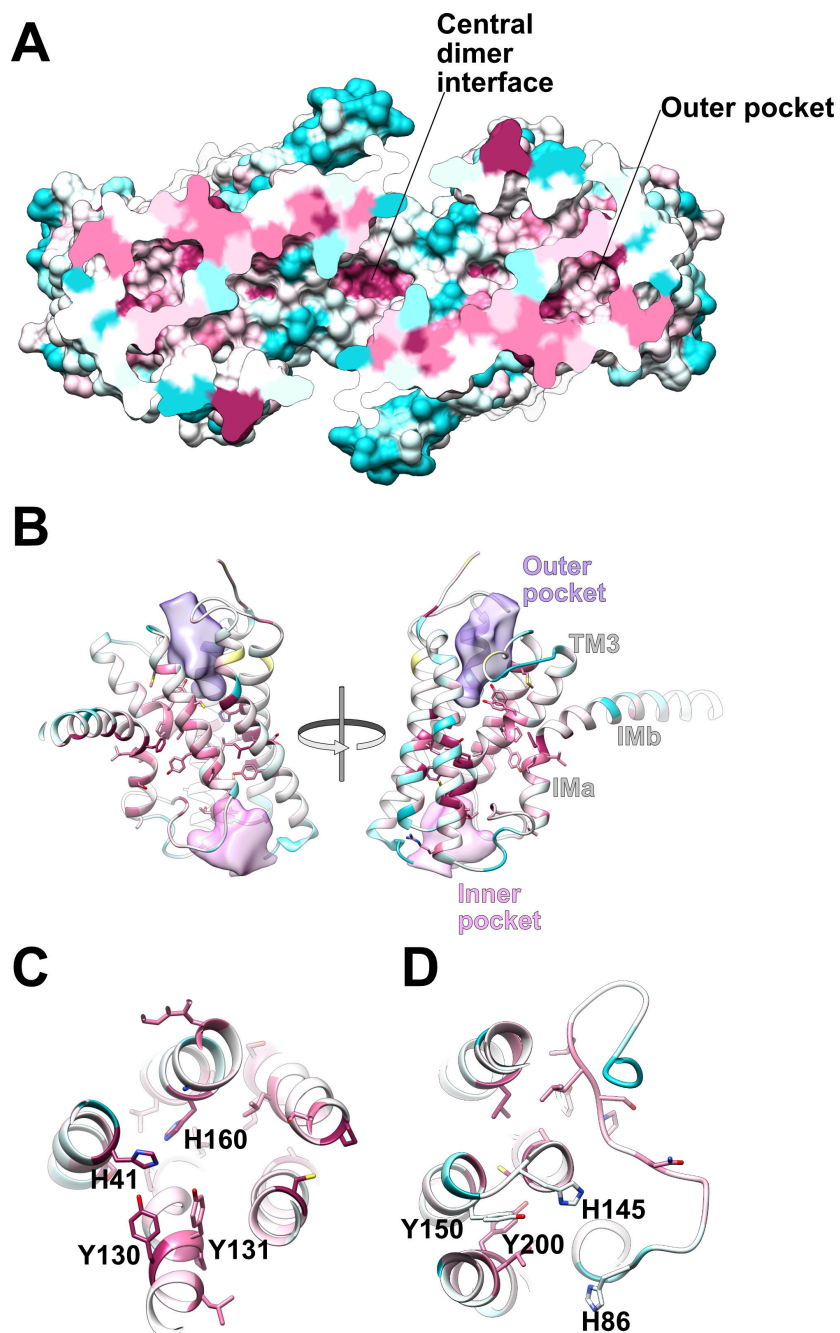

**Fig. S13. Conservation of STRA6 within the outer cleft and pockets.** (A) Slab in the membrane plane of the STRA6 conservation surface using the ConSurf server, viewed from the extracellular region. The STRA6 molecular surface is colored from cyan (least conserved) to maroon (most conserved). (B) Ribbon representation of the NTD, IMA and IMb colored by conservation as in (A), with conserved residues represented in stick, and the bounding surfaces of each pocket shown in purple and pink transparent surfaces for the outer and inner pockets, respectively. (C) Molecular details of conserved interactions within the outer pocket. (D) Molecular details of interactions within the outer pocket.





negatively charged (D, E) in red, polars (S, T, N, Q) in green, G in magenta, P in cyan, C in yellow. Secondary structure elements are labeled and displayed above the alignment, in yellow. Solid and dotted indicate regions of the protein, which are visible and disordered in the structure, respectively.

**Movie S1. Density quality of STRA6.** The STRA6-CaM complex is depicted in ribbon representation with one STRA6 protomer in spectral coloring (violet N-terminus to red C-terminus). The associated protomer of CaM is colored cyan. The density map is represented as blue mesh and contoured at 7 X R.M.S.

**Movie S2. STRA6-CaM interactions.** CaM is represented as a molecular surface colored by hydrophobicity according to the Kyte-Doolittle scale (71) from -4.5 (most polar) in light blue to 4.5 (most hydrophobic) in orange. The N-lobe of CaM is initially at the top of the screen. CaMBP0, 1 and 2 are depicted in ribbon representation with side chains shown in stick. The CaMBPs are colored by conservation from cyan (least conserved) to maroon (most conserved), based on the alignment presented in **Fig. 2** and **Fig. S7**.
